# Supplementary material for: Re-evaluating luminescence burial doses and bleaching of fluvial deposits using Bayesian computational statistics
Source: Copernicus journal article supplement (doi:10.5194/esurf-3-55-2015), 2015-01-16
Supplement: Supplementary file 1 [file esurf-3-55-2015-supplement.zip]

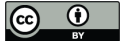

## *Supplement of*

# **Re-evaluating luminescence burial doses and bleaching of fluvial deposits using Bayesian computational statistics**

**A. C. Cunningham et al.**

*Correspondence to:* A. C. Cunningham (acunning@uow.edu.au)

- esurf-3-55-2015-supplement-cover-letter.pdf
- Supplementary Info
  - Matlab Scripts
    - \* BootRecycling.m
    - \* BootRecyclingCAM.m
    - \* BootRecyclingGAM.m
    - \* ESURF\_MAINLINE.m
    - \* INP\_FUNC\_esurf.m
    - \* MakeLikelihoodGAM.m
    - \* MeasCond\_4110.mat
    - \* PLOT\_OUTPUT.m
    - \* Phase1\_p5.m
    - \* Phase3\_p5\_jlist.m
    - \* Pr\_A\_esurf.m
    - \* Pr\_B\_esurf.m
    - \* Pr\_burial\_Uniform.m
    - \* Pr\_p\_esurf.m
    - \* Pr\_sd2\_esurf.m
    - \* evalprior.m
    - \* find\_Ph1\_starts\_p5.m
    - \* findgamma\_NGRAINS.m
    - \* fitburialhist.m
    - \* genDe\_R1\_lin.m
    - \* getCAM.m
    - \* getCAMul.m
    - \* getLIK.m
    - \* getWAV.m

- \* get\_polyfit.m
- \* getmam3.m
- \* getmam3ul.m
- \* jointlik.m
- \* logthis.m
- \* makepdf.m
- \* massage\_limits.m
- \* smooth\_n\_chop.m
- \* smoothpairs.m
- \* struc1107146.mat
- \* struc1110008.mat
- \* struc4110020.mat
- Table S1.xls
- Table S2 Correlations.xls
